# Supplementary material for: Framework dimensionality of copper(i) coordination polymers of 4,4′-bipyrimidine controlled by anions and solvents
Source: Royal Society of Chemistry journal article supplement (doi:10.1039/c1ce06328f), 2011-12-03
Supplement: c1ce06328f.pdf [file c1ce06328f.pdf]

[Electronic Supplementary Information (ESI) of CE-ART-10-2011-006328]

**Framework dimensionality of copper(I) coordination polymers of 4,4'-bipyrimidine controlled by anions and solvents**

Masahiko Maekawa,<sup>\*a</sup> Toshi Tominaga,<sup>b</sup> Kuniyoshi Sugimoto,<sup>c</sup> Takashi Okubo,<sup>b</sup> Takayoshi Kuroda-Sowa,<sup>b</sup> Megumu Munakata<sup>b</sup> and Susumu Kitagawa<sup>d</sup>

<sup>a</sup> *Research Institute for Science and Technology, Kinki University, Kowakae, Higashi-Osaka, Osaka 577-8502, Japan. E-mail: maekawa@rist.kindai.ac.jp*

<sup>b</sup> *Department of Chemistry, Kinki University, Kowakae, Higashi-Osaka, Osaka 577-8502, Japan*

<sup>c</sup> *Research and Utilization Division, Japan Synchrotron Radiation Research Institute, Kouto, Sayo-cho, Sayo-gun, Hyogo 679-5198, Japan*

<sup>d</sup> *Department of Synthetic Chemistry and Biological Chemistry, Graduate School of Engineering, Kyoto University, Katsura, Nishikyo-ku, Kyoto 615-8510, Japan.*

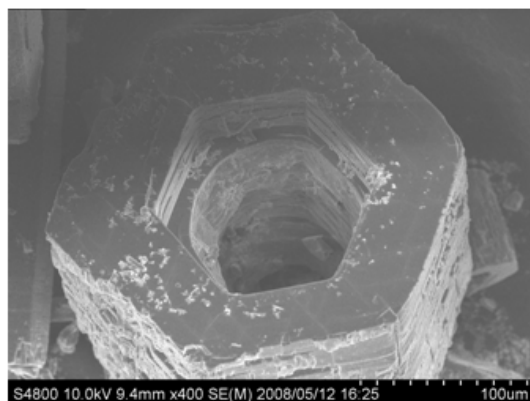

(a)

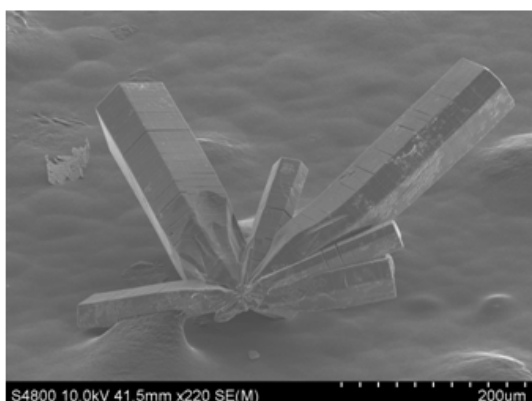

(b)

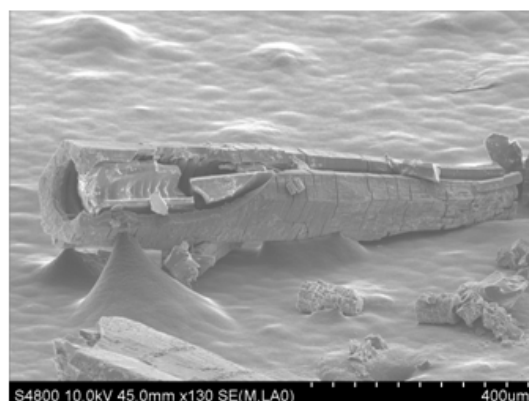

(c)

**Fig. S-1** The SEM images of hexagonal prismatic crystals **4a**.

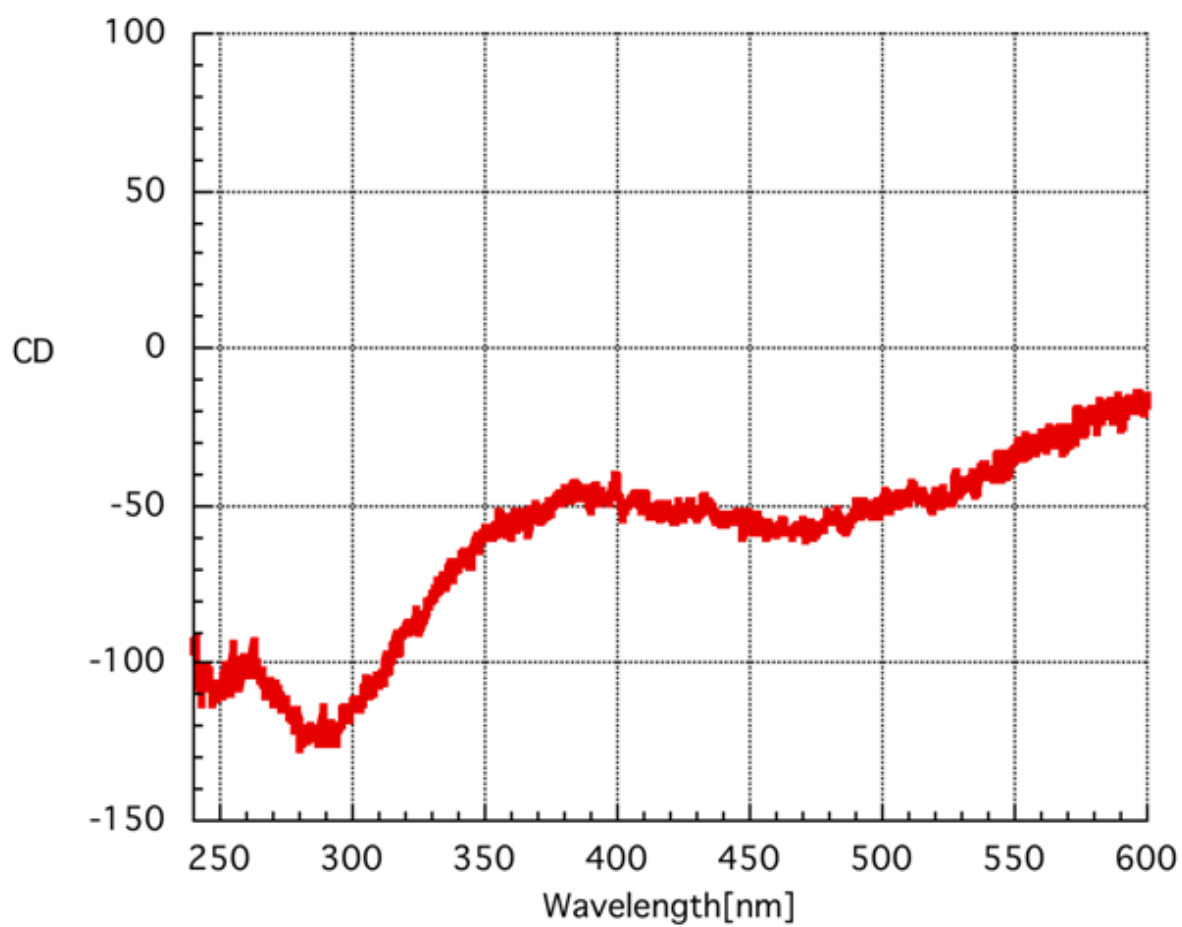

**Fig. S-2** CD spectrum of  $\{[\text{Cu}_4(\text{bpm})_3(\text{C}_2\text{H}_4)_3(\text{MeOH})](\text{BF}_4)_4 \cdot 2\text{H}_2\text{O} \cdot 3\text{MeOH}\}_n$  (**4a**)
